# Supplementary material for: Increased activated regulatory T cell subsets and aging Treg-like cells in multiple myeloma and monoclonal gammopathy of undetermined significance: a case control study
Source: Springer Nature journal article supplement (doi:10.1186/s12935-018-0687-8), 2018-11-19
Supplement: MOESM1 [file 16279820]

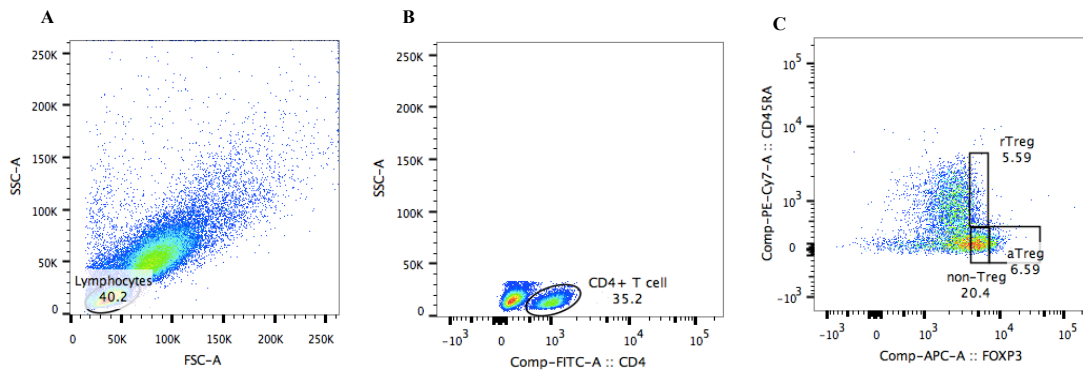

**Additional file 1: Figure S1. The gating strategy of Treg subsets.** Phenotype of Treg cell subsets: resting Treg cells, activated Treg cells and non-Treg cells. (A) PBMCs or BMMCs were gated on FSC, SSC and analyzed for lymphocytes. (B) Percentages of CD4<sup>+</sup> T cells gated on CD4 and SSC. (C) Three subsets of CD4<sup>+</sup> T cells are defined by the expression of CD45RA and FoxP3: CD45RA<sup>+</sup>FoxP3<sup>lo</sup> cells, CD45RA<sup>-</sup>FoxP3<sup>hi</sup> cells, CD45RA<sup>-</sup>FoxP3<sup>lo</sup> cells; Representative dot plots are shown for an untreated MM patient.
