# Supplementary material for: Increased activated regulatory T cell subsets and aging Treg-like cells in multiple myeloma and monoclonal gammopathy of undetermined significance: a case control study
Source: Springer Nature journal article supplement (doi:10.1186/s12935-018-0687-8), 2018-11-19
Supplement: MOESM2 [file 16279820]

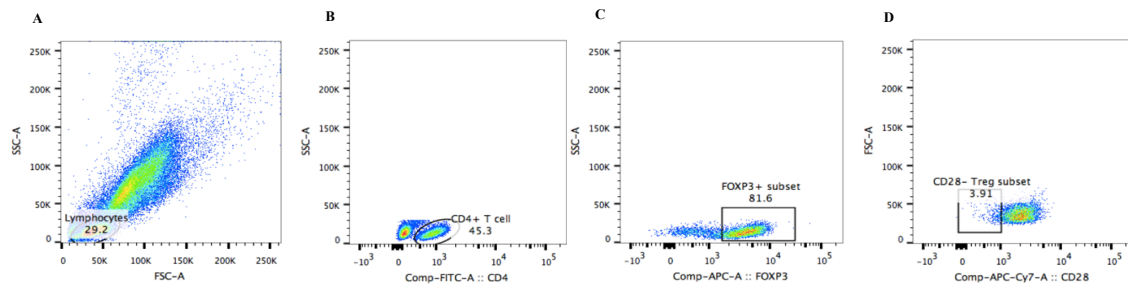

**Additional file 2: Figure S2. The gating strategy of CD28<sup>-</sup> Treg-like cells.** Phenotype of Treg-like cell subsets. (A) PBMCs or BMMCs were gated on FSC, SSC and analyzed for lymphocytes. (B) Percentages of CD4<sup>+</sup> T cells gated on CD4 and SSC. (C) Percentages of CD4<sup>+</sup>FOXP3<sup>+</sup> cells gated on FoxP3 and SSC. (D) Percentages of CD4<sup>+</sup>CD28<sup>-</sup>FOXP3<sup>+</sup> cells gated on CD28 and FSC. Representative dot plots are shown for an untreated MM patient.
