# Supplementary material for: Increased activated regulatory T cell subsets and aging Treg-like cells in multiple myeloma and monoclonal gammopathy of undetermined significance: a case control study
Source: Springer Nature journal article supplement (doi:10.1186/s12935-018-0687-8), 2018-11-19
Supplement: MOESM3 [file 16279820]

**Additional file 3: Table S1. The suppressive percentage\* of Treg subsets from MM patients and healthy volunteers**

| MM | aTreg(%) | rTreg(%) | non-Treg (%) | HA | aTreg(%) | rTreg(%) | non-Treg (%) |
|----|----------|----------|--------------|----|----------|----------|--------------|
| 01 | 66.5     | 49.7     | 20.1         | 01 | 68.2     | 59.7     | 20.3         |
| 02 | 67.7     | 59.1     | 16.8         | 02 | 63.1     | 41.1     | 24.0         |
| 03 | 66.0     | 55.5     | 21.2         | 03 | 56.5     | 40.9     | 29.2         |
| 04 | 69.0     | 52.1     | 20.1         |    |          |          |              |
| 05 | 73.6     | 59.2     | 19.2         |    |          |          |              |
| 06 | 56.8     | 53.3     | 20.0         |    |          |          |              |
| 07 | 68.5     | 56.1     | 14.8         |    |          |          |              |
| 08 | 80.3     | 56.1     | 26.4         |    |          |          |              |

\*Suppression percentage = (number of proliferating CFSE-labeled responder cells when co-cultured with suppressor cells/ number of proliferating responder cells when cultured alone) x100%.
